# Supplementary material for: Hybrid networks constructed from tetrahedral silicon-centered precursors and cubic POSS-based building blocks via Heck reaction: porosity, gas sorption, and luminescence
Source: Royal Society of Chemistry journal article supplement (doi:10.1039/c3ta12324c), 2013-01-01
Supplement: c3ta12324c.pdf [file c3ta12324c.pdf]

## **Electronic Supplementary Information**

### **Hybrid Networks Constructed from Tetrahedral Silicon-Centered Precursors and Cubic POSS-Based Building Blocks via Heck Reaction: Porosity, Gas Sorption, and Luminescence**

Dengxu Wang,<sup>a,b</sup> Wenyan Yang,<sup>a</sup> Ligu Li,<sup>a</sup> Xian Zhao,<sup>b</sup> Shengyu Feng,<sup>\*a</sup> and Hongzhi Liu<sup>\*a</sup>

<sup>a</sup>Key Laboratory of Special Functional Aggregated Materials, Ministry of Education, School of Chemistry and Chemical Engineering, Shandong University, Jinan 250100, P. R. China

<sup>b</sup>State Key Lab of Crystal Materials, Shandong University, Jinan 250100, P. R. China

\*Corresponding Author. Tel: +86 531 88364866. Fax: +86 531 88564464. E-mail: fsy@sdu.edu.cn; liuhongzhi@sdu.edu.cn

## Table of contents:

**Fig. S1.** Energy dispersive spectroscopy of HPP-1 to HPP-5

**Fig. S2.** FT-IR spectrum of HPP-1 to HPP-5

**Fig. S3.** Solid-state  $^{13}\text{C}$  CP/MAS NMR spectra of HPP-1~HPP-5 at an expanded scale from 100 ppm to 160 ppm

**Fig. S4.** Nitrogen sorption isotherms of HPP-1 (a) and (b) HPP-2. Filled and empty symbols denote adsorption and desorption branches. The porosity data of HPP-1:  $S_{\text{BET}} = 167 \text{ m}^2 \text{ g}^{-1}$ ,  $V_{\text{total}} = 0.18 \text{ cm}^3 \text{ g}^{-1}$ .

**Fig. S5.** BET plots of HPP-3 (up,  $r = 0.999958$ ,  $C = 290.91$ ), HPP-4 (middle,  $r = 0.999956$ ,  $C = 299.075$ ) and HPP-5 (bottom,  $r = 0.999927$ ,  $C = 298.54$ )

**Fig. S6.** TGA curves of OVS and HPP-1~HPP-5 under  $\text{N}_2$  ( $10 \text{ }^\circ\text{C min}^{-1}$ )

**Fig. S7.** The XRD pattern of HPP-1 to HPP-5

**Fig. S8.** FE-SEM images of a) HPP-4 and b) HPP-5

**Fig. S9.** Gas sorption isotherms of HPP-5. (a)  $\text{H}_2$  adsorption isotherm at 77 K. (b)  $\text{CO}_2$  adsorption and desorption isotherm, and  $\text{CH}_4$  adsorption isotherm at 298 K. Filled and empty symbols denote adsorption and desorption branches, respectively.

**Fig. S10.** (a)  $\text{H}_2$  adsorption isotherm of HPP-5 at 87 K; (b) Isothermic heats of sorption for  $\text{H}_2$  on HPP-5.

**Fig. S11.** Toth model fitting of  $\text{CO}_2$  (a) and  $\text{CH}_4$  (b) adsorption isotherms of HPP-5 at 298 K

**Fig. S12.** Fluorescent spectra of monomers, **1~5** in the solid state (excited at 310 nm)

**Fig. S13.** Fluorescence microscopic images of (a) HPP-1, (b) HPP-2 and (c) HPP-3

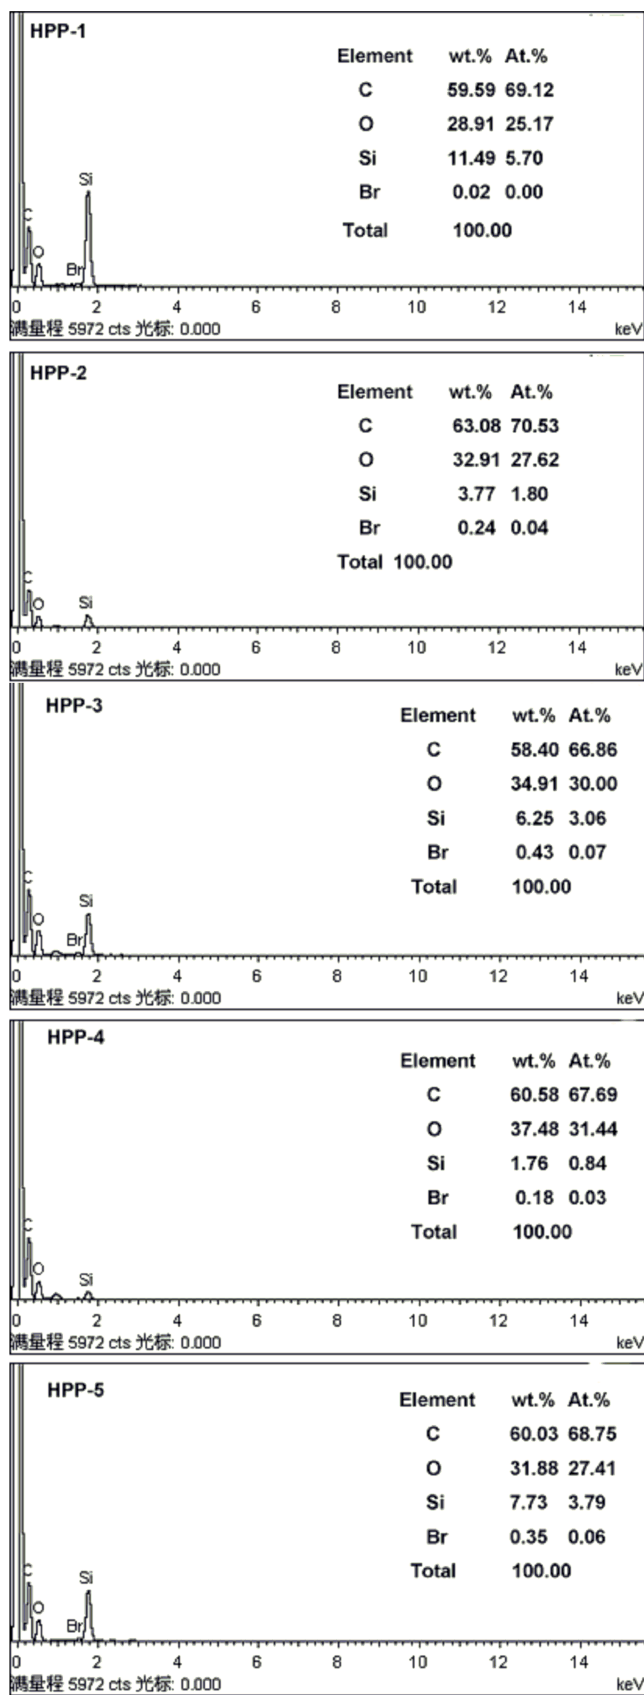

Fig. S1. Energy dispersive spectroscopy of HPP-1 to HPP-5

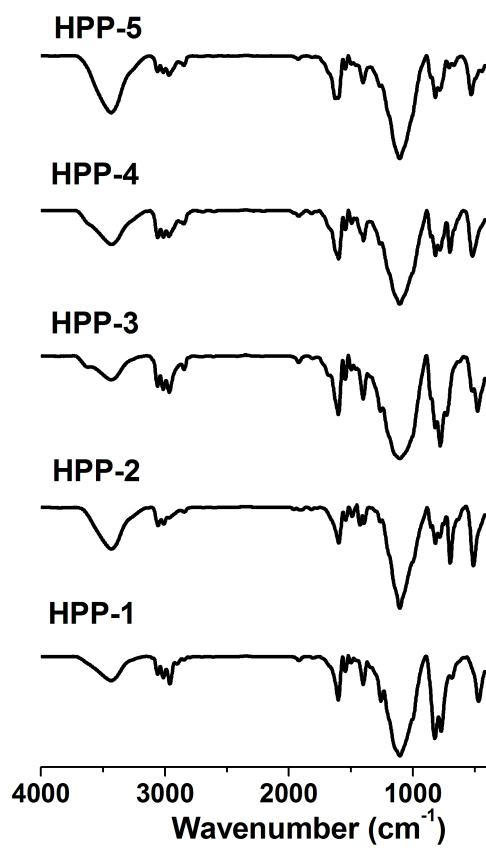

**Fig. S2.** FT-IR spectrum of HPP-1 to HPP-5

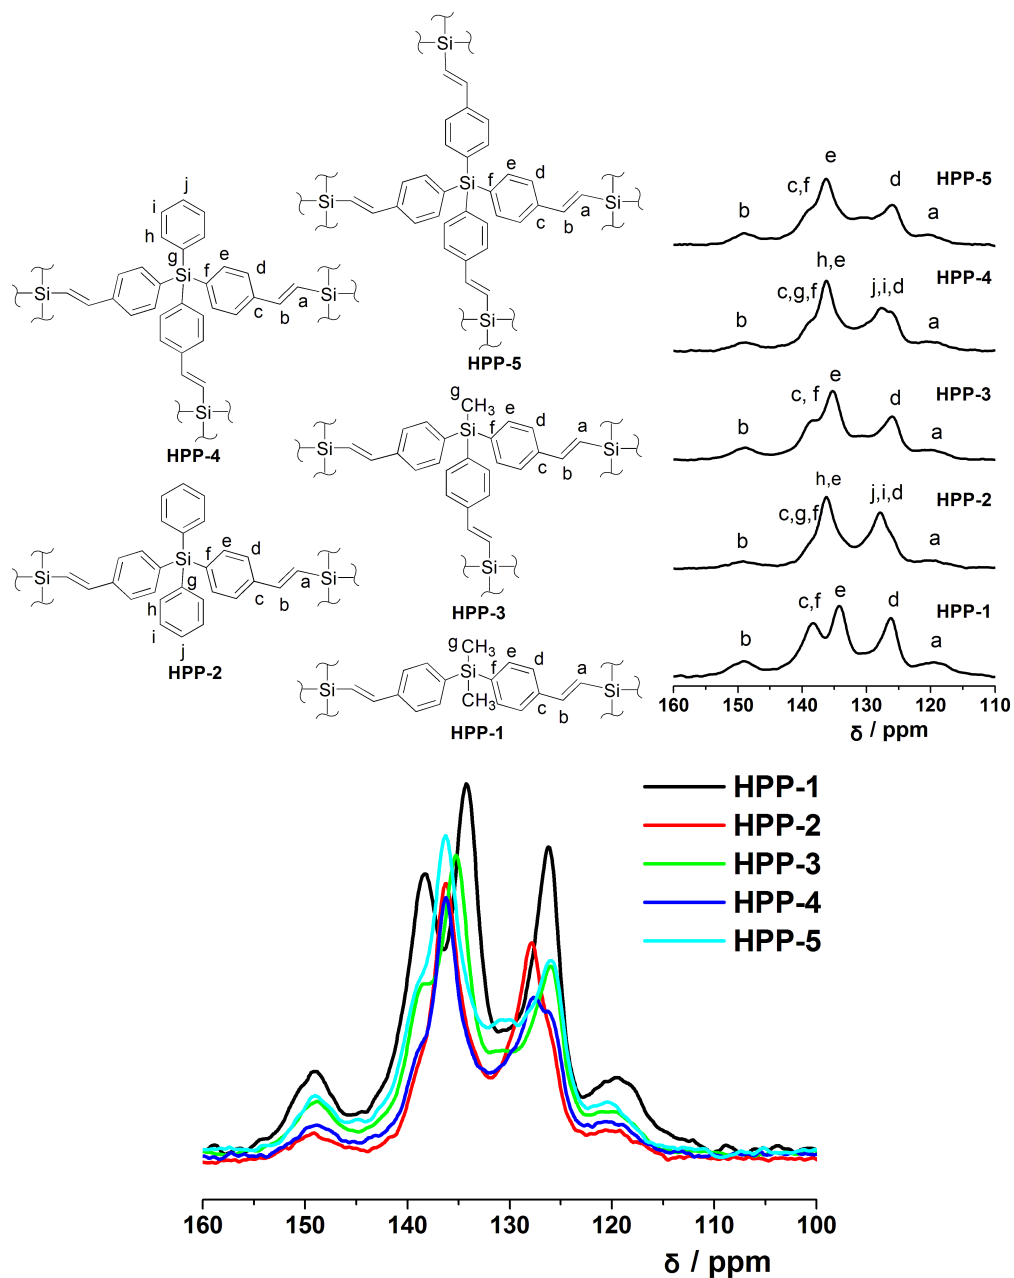

**Fig. S3.** Solid-state  $^{13}\text{C}$  CP/MAS NMR spectra of **HPP-1~HPP-5** at an expanded scale from 100 ppm to 160 ppm

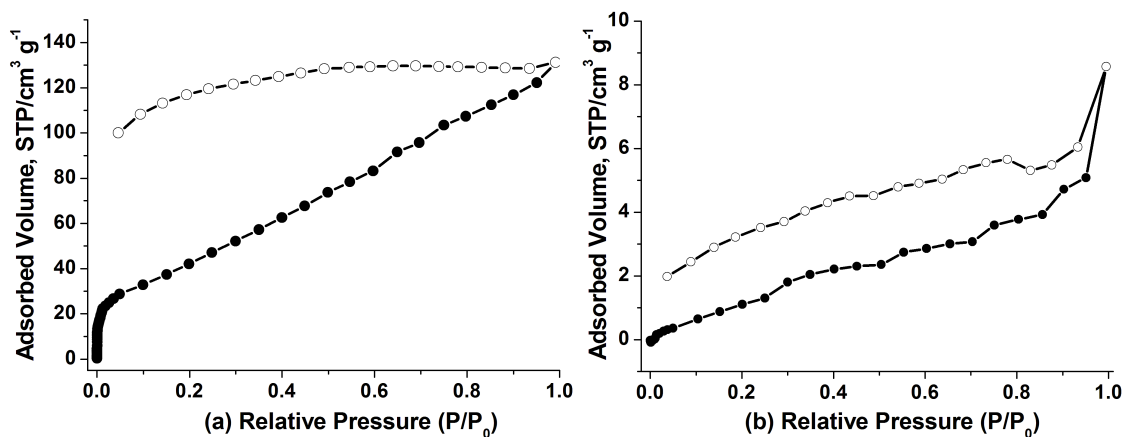

**Fig. S4.** Nitrogen sorption isotherms of HPP-1 (a) and (b) HPP-2. Filled and empty symbols denote adsorption and desorption branches. The porosity data of HPP-1:  $S_{\text{BET}} = 167 \text{ m}^2 \text{ g}^{-1}$ ,

$$V_{\text{total}} = 0.18 \text{ cm}^3 \text{ g}^{-1}.$$

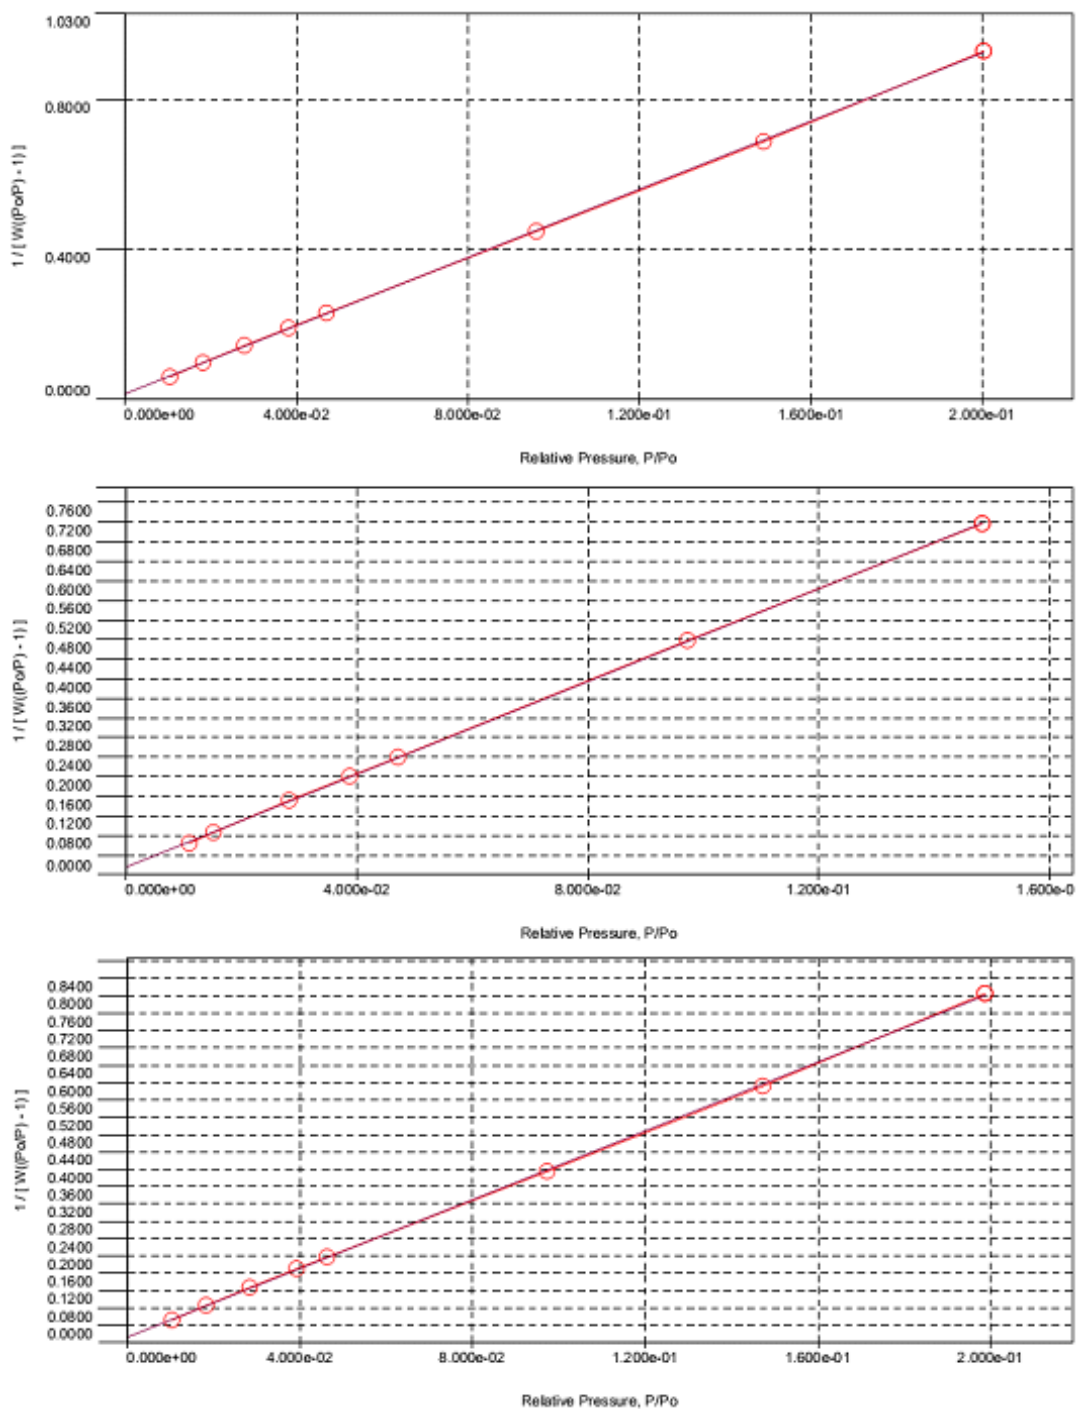

**Fig. S5.** BET plots of HPP-3 (up,  $r = 0.999958$ ,  $C = 290.91$ ), HPP-4 (middle,  $r = 0.999956$ ,  $C = 299.075$ ) and HPP-5 (bottom,  $r = 0.999927$ ,  $C = 298.54$ )

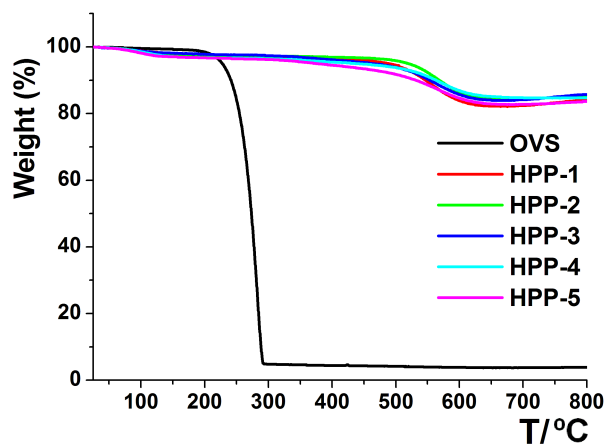

**Fig. S6.** TGA curves of OVS and HPP-1~HPP-5 under N<sub>2</sub> (10 °C min<sup>-1</sup>)

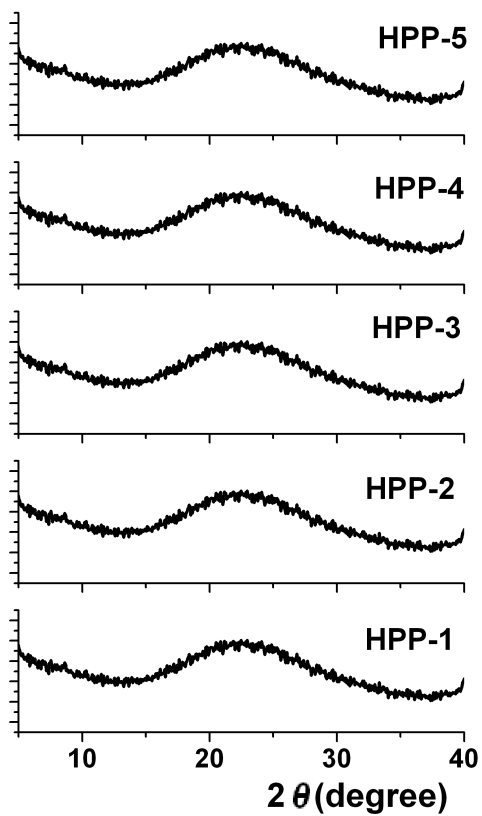

**Fig. S7.** The XRD pattern of HPP-1 to HPP-5



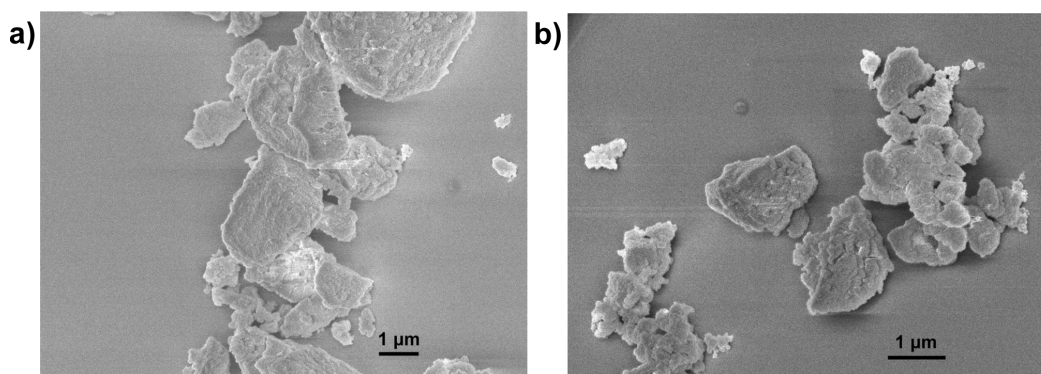

**Fig. S8.** FE-SEM images of a) HPP-4 and b) HPP-5

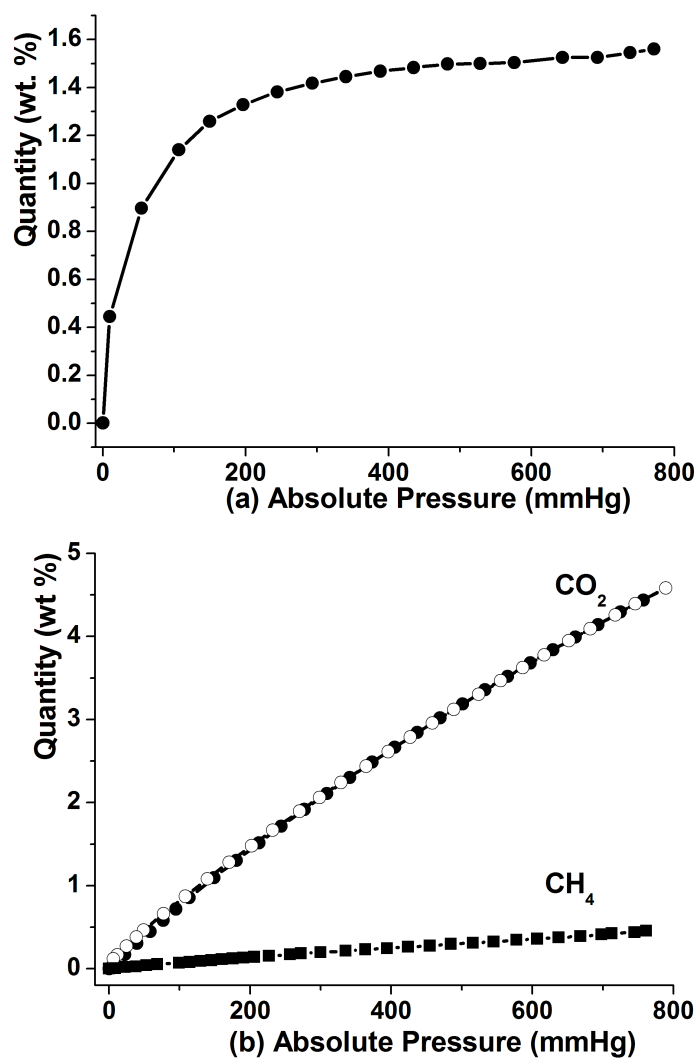

**Fig. S9.** Gas sorption isotherms of HPP-5. (a) H<sub>2</sub> adsorption isotherm at 77 K. (b) CO<sub>2</sub> adsorption and desorption isotherm, and CH<sub>4</sub> adsorption isotherm at 298 K. Filled and empty symbols denote adsorption and desorption branches, respectively

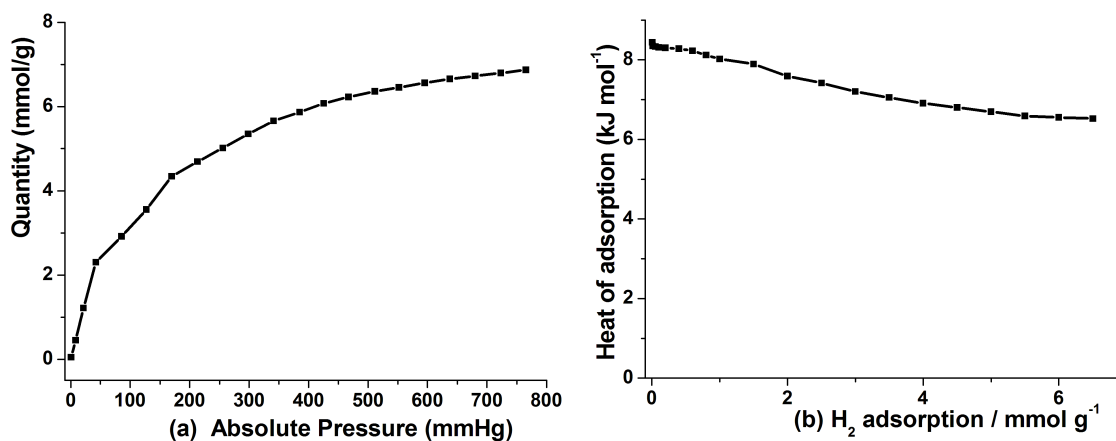

**Fig. S10.** (a) H<sub>2</sub> adsorption isotherm of HPP-5 at 87 K; (b) Isosteric heats of sorption for H<sub>2</sub> on HPP-5.

### Henry's Law selectivity of CO<sub>2</sub> over CH<sub>4</sub> in HPP-5 at 298 K

A nice fitting of CO<sub>2</sub> and CH<sub>4</sub> isotherms has been calculated based on Toth isotherm model.<sup>[1,2]</sup>

$$q = q_{sat} \frac{b^{1/t} P}{(1 + b^t)^{1/t}}$$

where  $q$  is the uptake in mmol g<sup>-1</sup>,  $q_{sat}$  is the saturation uptake in mmol g<sup>-1</sup>,  $P$  is the pressure in torr,  $t$  and  $b$  are parameters which are specific for adsorbent pairs.

The Henry law constant  $K$ , quantifies the extent of the adsorption of a given adsorbate by a solid. The magnitude of  $K$  depends on the properties of both adsorbate and solid. For the Toth isotherm, the Henry law constant is defined by the following equation:

$$K = \lim_{P \rightarrow 0} \left( \frac{dq}{dP} \right) = b^{1/t} q_{sat}$$

Finally, the Henry's Law selectivity  $S_{\alpha/\beta}$  of gas  $\alpha$  over  $\beta$  is given by the following equation:

$$S_{\alpha/\beta} = \frac{K_{\alpha}}{K_{\beta}}$$

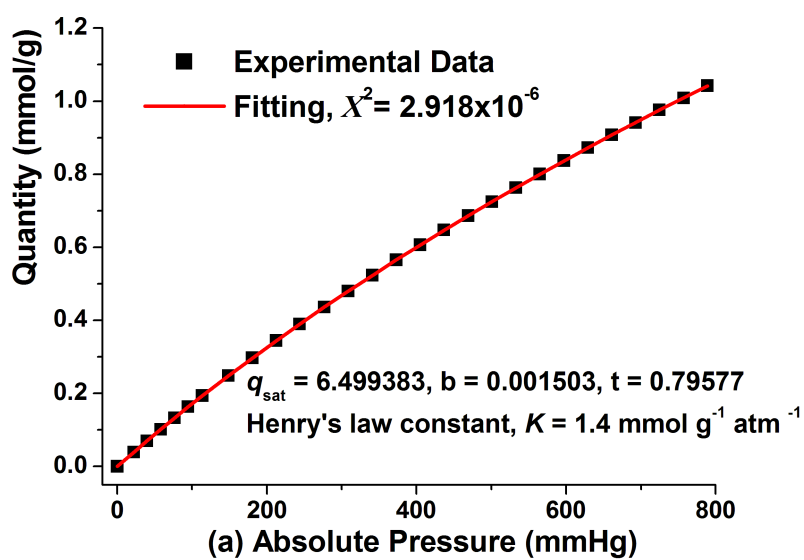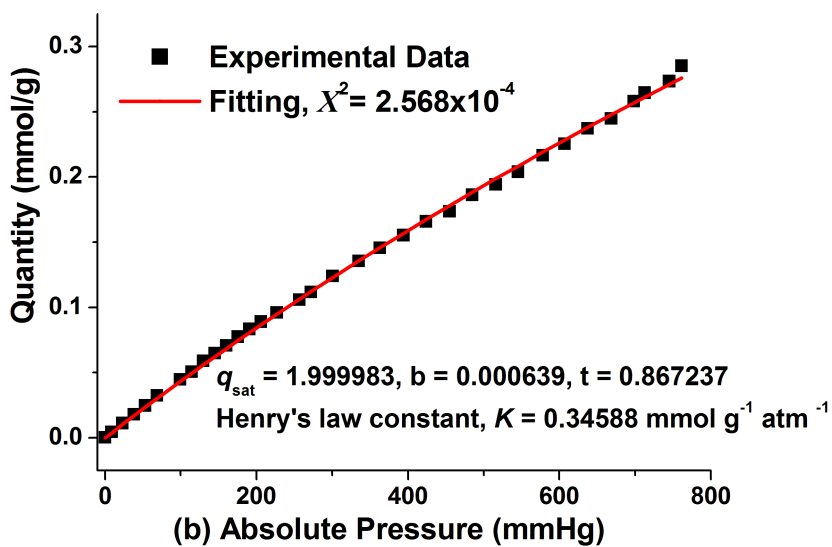

**Fig. S11.** Toth model fitting of CO<sub>2</sub> (a) and CH<sub>4</sub> (b) adsorption isotherms of HPP-5 at 298 K

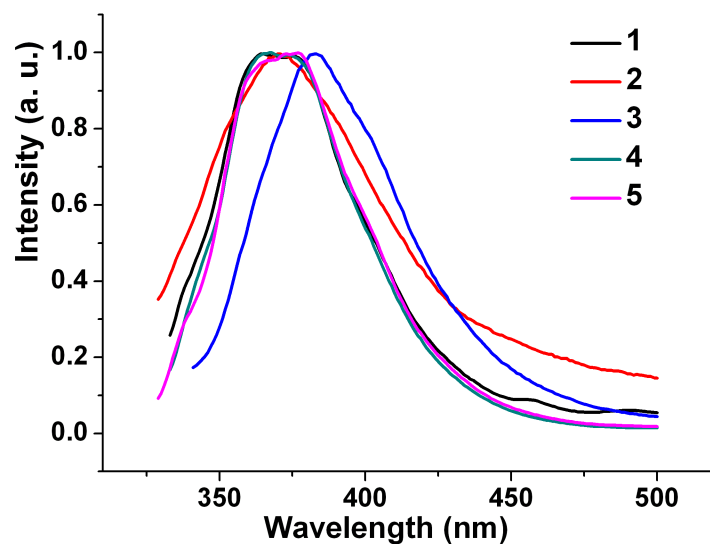

**Fig. S12.** Fluorescent spectra of monomers, 1~5 in the solid state (excited at 310 nm)

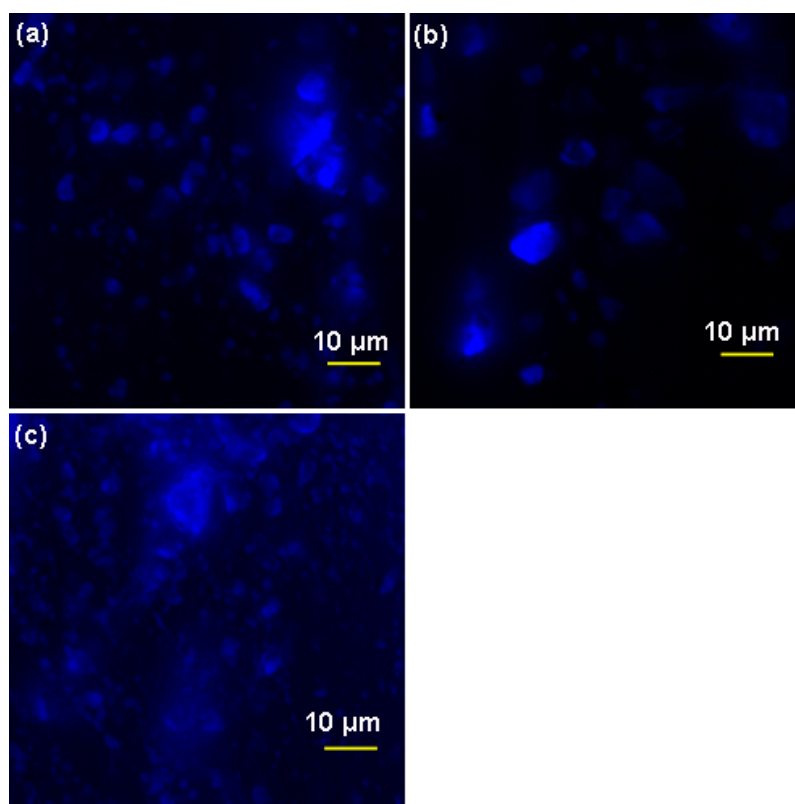

**Fig. S13.** Fluorescence microscopic images of (a) HPP-1, (b) HPP-2 and (c) HPP-3

## References

- [1] E. Neofotistou, C. D. Malliakas, P. N. Trikalitis, *Chem. Eur. J.*, 2009, **15**, 4523–4527.
- [2] B. Wang, A. P. Côté, H. Furukawa, M. O’Keeffe, O. M. Yaghi, *Nature*, 2008, **453**, 207–211.
